# Supplementary material for: Structural and magnetic studies of mononuclear lanthanide complexes derived from N-rich chiral Schiff bases
Source: Royal Society of Chemistry journal article supplement (doi:10.1039/d0dt04224b), 2020-12-29
Supplement: d0dt04224b1.pdf [file d0dt04224b1.pdf]

Electronic Supplementary Material (ESI) for Dalton Transactions.  
This journal is © The Royal Society of Chemistry 2020

Electronic Supplementary Material (ESI) for

***Structural and magnetic studies of mononuclear lanthanide complexes derived from N-rich chiral Schiff bases.***

E. Pilichos,<sup>a</sup> M. Font-Bardia,<sup>b</sup> A. Escuer,<sup>\*a</sup> and J. Mayans<sup>\*c</sup>

<sup>a</sup> Departament de Química Inorgànica i Orgànica, Secció Inorgànica and Institute of Nanoscience (IN<sup>2</sup>UB) and Nanotechnology, Universitat de Barcelona, Martí i Franquès 1-11, Barcelona-08028, Spain.

<sup>b</sup> Departament de Mineralogia, Cristal·lografia i Dipòsits Minerals and Unitat de Difracció de R-X. Centre Científic i Tecnològic de la Universitat de Barcelona (CCiTUB). Universitat de Barcelona. Solé i Sabarís 1-3. 08028 Barcelona.

<sup>c</sup> Instituto de Ciencia Molecular (ICMol), Universidad de Valencia, Catedrático José Beltran 2, 46980 Paterna (Valencia), Spain

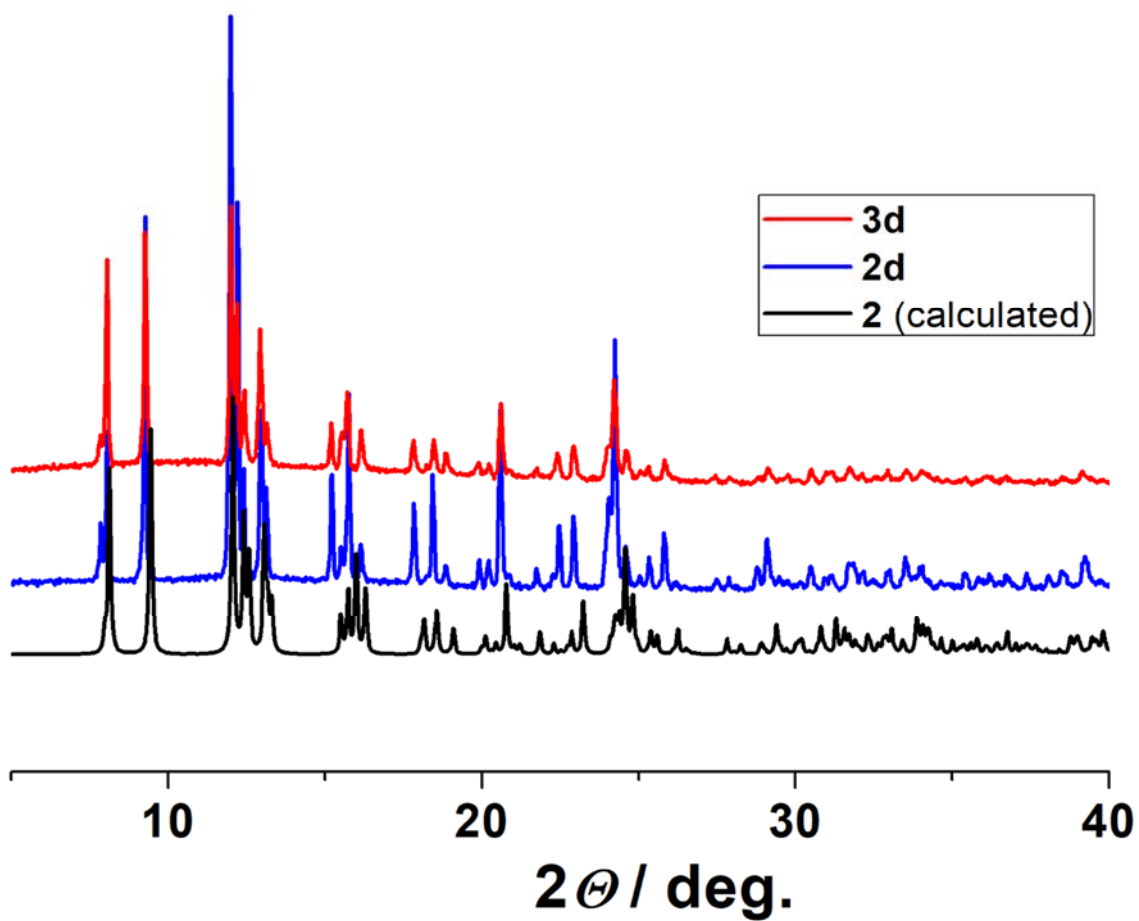

**Fig. S1.** Powder X-Ray spectra for the diluted complexes **2d** and **3d**. In black is represented the simulated powder spectra from the single crystal structure of the complex **2**.

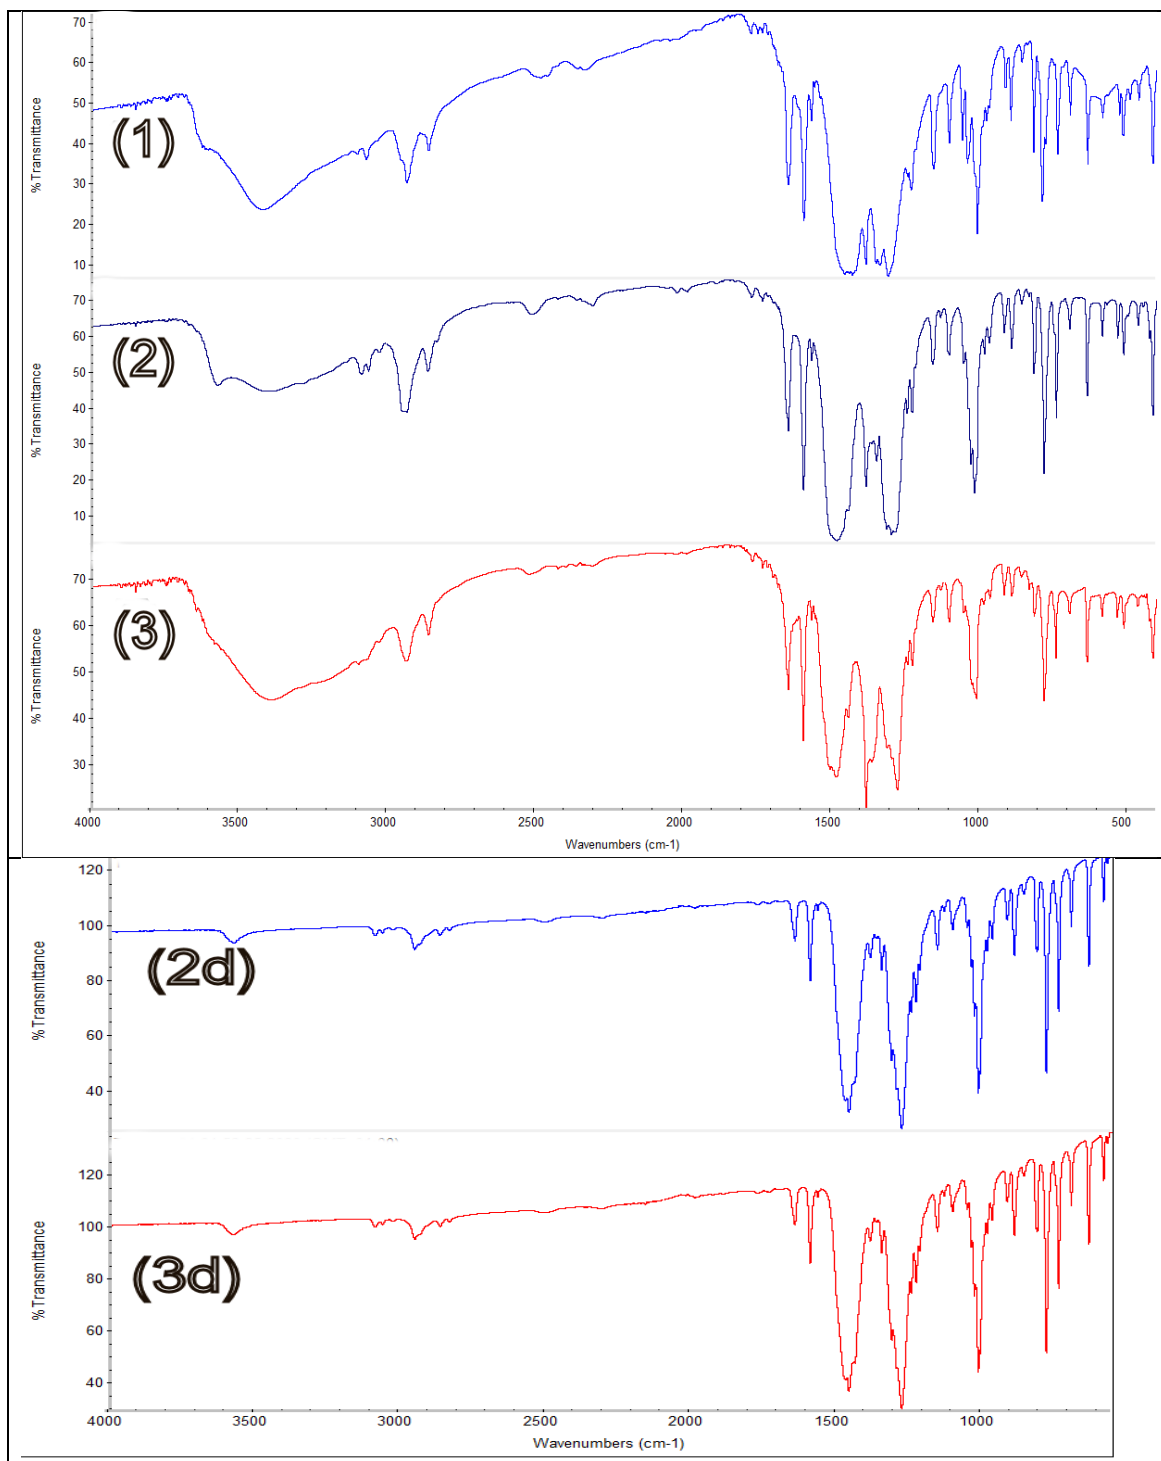

**Fig. S2.** IR spectra for complexes [Ce(L)(NO<sub>3</sub>)<sub>3</sub>(MeOH)] (1), [Gd(L)(NO<sub>3</sub>)<sub>3</sub>] (2) and [Dy(L)(NO<sub>3</sub>)<sub>3</sub>] (3) the diluted 2d and 3d.

**Table S1.** CShM values for the undecacoordinated environment of complex **1** and the decacoordinated complex **2**. The relatively high distortion with the ideal polyhedra are due to the low bite of the nitrate and *cis* N-donors of the Schiff base.

| 11-vertex Polyhedra               | Ce <sup>III</sup> ( 1 ) | 10-vertex Polyhedra               | Gd <sup>III</sup> ( 2 ) |
|-----------------------------------|-------------------------|-----------------------------------|-------------------------|
| Capped pentagonal prism (C5v)     | 5.64                    | Bicapped cube (D4h)               | 9.77                    |
| Capped pentagonal antiprism (C5v) | 5.99                    | Bicapped square antiprism (D4d)   | 4.67                    |
| Augmented sphenocorona (cs)       | 7.73                    | Metabidiminshed icosahedron (C2v) | 7.08                    |
|                                   |                         | Sphenocorona (C2v)                | 3.05                    |
|                                   |                         | Staggered Dodecahedron (D2)       | 4.66                    |

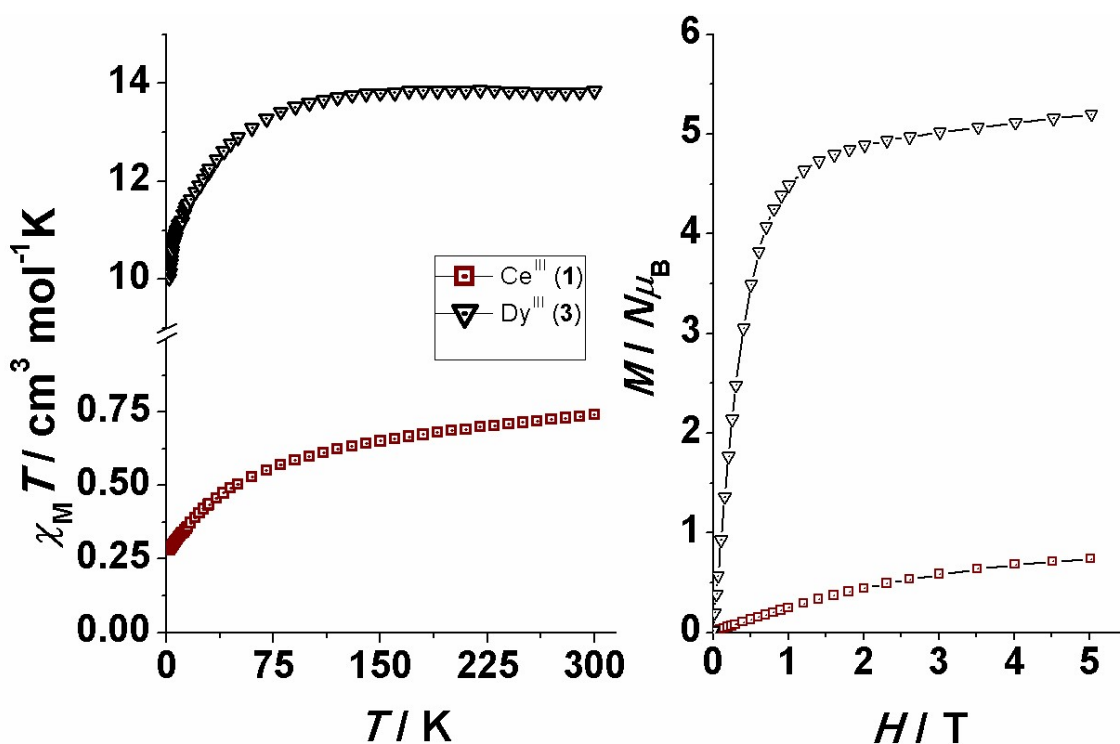

**Fig. S3.**  $\chi_M T$  (left) and magnetization (right) plots for referred complexes. The  $\chi_M T$  values at room temperature are very close to the expected values for a lonely isolated lanthanide ions (**expected/experimental**  $\text{cm}^3 \cdot \text{mol}^{-1} \cdot \text{K}$ ): Ce<sup>III</sup>, ( ${}^2F_{5/2}$ ,  $g = 6/7$ , **0.80/0.74**  $\text{cm}^3 \cdot \text{mol}^{-1} \cdot \text{K}$ ), Dy<sup>III</sup> ( ${}^6H_{15/2}$ ,  $g = 4/3$ , **14.2/13.8**  $\text{cm}^3 \cdot \text{mol}^{-1} \cdot \text{K}$ ).

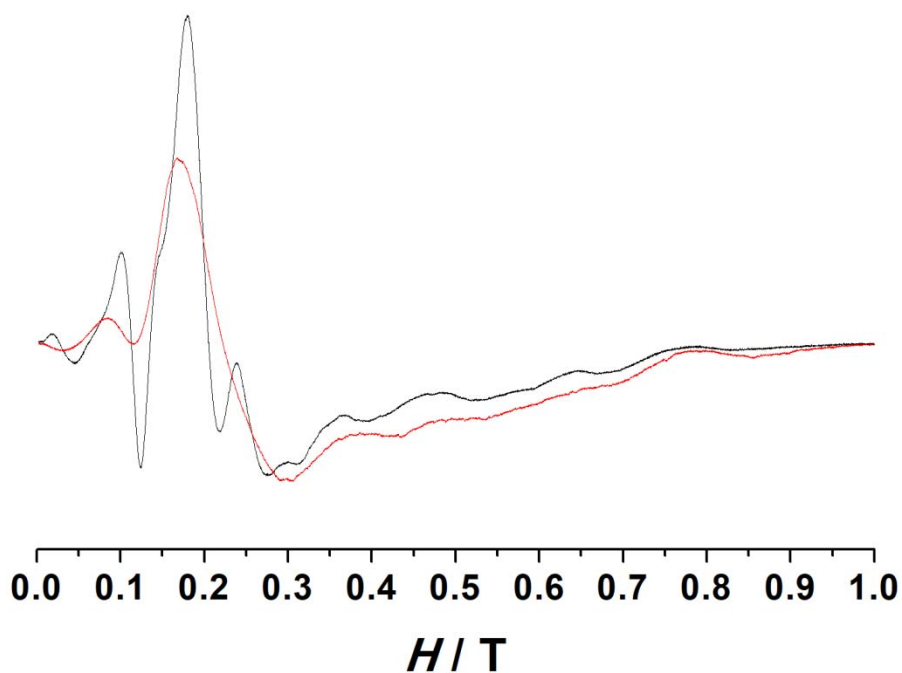

**Fig. S4.** X-band EPR spectra for the Gd<sup>III</sup> compounds **2** (red) and **2d** (black). Reduction of dipolar interactions allows sharper lines for **2d**. The identical spectra confirm the same environment after dilution.

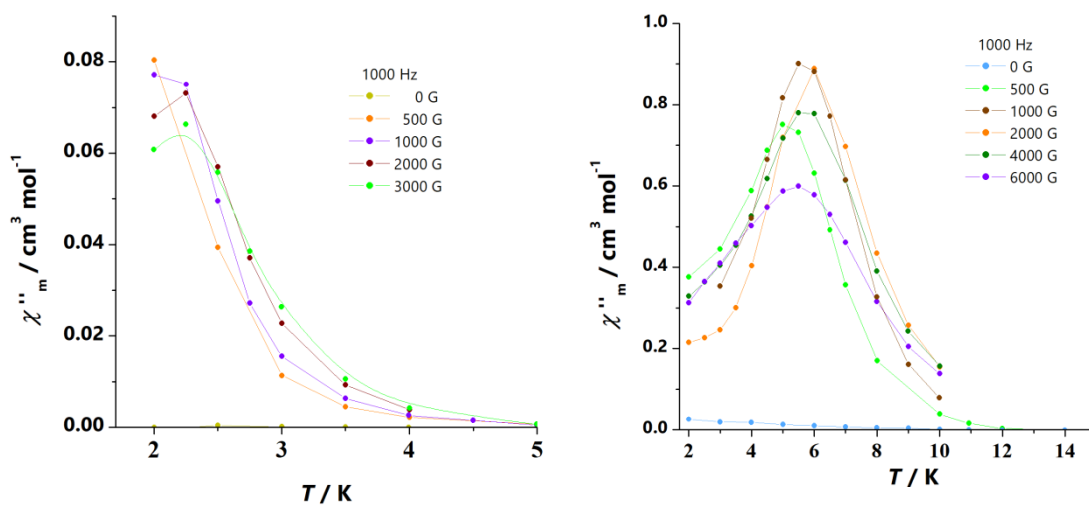

**Fig. S5.**  $\chi''_m$  dependence of the transverse field for complex **1** (left) and **3** (right). From this initial dependence the fields to perform the *ac* measurements were 2000 G for **1** and 1000 G for **3**.

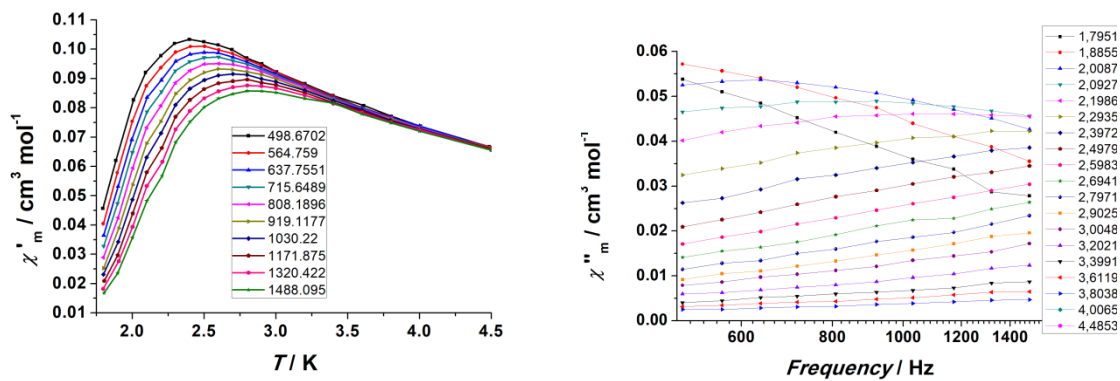

Fig. S6.  $\chi'_M$  vs.  $T$  (left) and  $\chi''_M$  vs. frequency (right) for complex **1**.

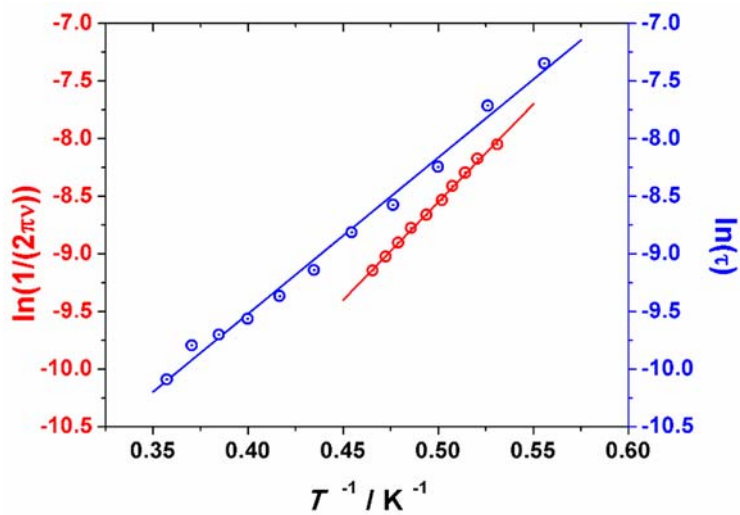

Fig. S7. Plot of  $\ln(1/2\pi\nu)$  vs.  $T^{-1}$  from the  $\chi''_M(T)$  data (red) and  $\ln(\tau)$  vs.  $T^{-1}$  from the fit of the Argand plot (blue) for complex **1**.
